# Supplementary material for: Variation and selection on codon usage bias across an entire subphylum
Source: PLoS Genet. 2019 Jul 31;15(7):e1008304. doi: 10.1371/journal.pgen.1008304 (PMC6701816; doi:10.1371/journal.pgen.1008304)
Supplement: S8 Table — Additionally, the Blomberg’s K of the individual species’ residuals used to compute the R2 value is reported. The individual neutral formulas from Palidwor et al. 2010 are also listed. (XLSX) [file pgen.1008304.s011.xlsx]

## Sheet: Supplementary Table 8
codon(s)	AA	rsq	Solution_ID	Moran's I	Abouheif's Cmean	Pagel's Lambda	Blomberk's K		Equilibrium Solutions - Table 1 Palidwor et al. 2010				B = GC bias/GC3
AAA	K	0.53777	I-2-AU	0.289945	0.292507	0.999934	0.404523		Solution ID	Amino Acid/Class	Individual or Summed	Codon(s)	Eq. Solution
AAC	N	0.840746	I-2-GC	0.253646	0.254517	0.999934	0.567009		I-2-AU	Two-fold Degenerate	Individual	--A or --U	1-B
AAG	K	0.53777	I-2-GC	0.289945	0.292507	0.999934	0.404523		I-2-GC	Two-fold Degenerate	Individual	--C or --G	B
AAU	N	0.840746	I-2-AU	0.253646	0.254517	0.999934	0.567009		I-4-AU	Four-fold Degenerate	Individual	--A or --U	(1-B)/2
ACA	T	0.6031	I-4-AU	0.122071	0.130025	0.999934	0.432547		I-4-GC	Four-fold Degenerate	Individual	--C or --G	B/2
ACC	T	0.573933	I-4-GC	0.25542	0.261608	0.999934	0.578803		I-I-AU	Isoleucine	Individual	AUA or AUU	(1-B)/(2-B)
ACC+ACG	T	0.801527	S-4-GC						I-I-C	Isoleucine	Individual	AUC	B/(2-B)
ACG	T	-0.77218	I-4-GC	0.239011	0.241742	0.996894	0.497207		I-RL-1	Arginine/Leucine	Individual	AGA or UUA	(1-B)^2/(1+B)
ACU	T	0.278703	I-4-AU	0.101076	0.104089	0.999934	0.388775		I-RL-2	Arginine/Leucine	Individual	CGA, CGU, AGG, CUA, CUU, or UUG	B(1-B)/(1+B)
ACU+ACA	T	0.801527	S-4-AU						I-RL-3	Arginine/Leucine	Individual	CGG, CGC, CUG, CUC	B^2/(1+B)
AGA	R	-0.871329	I-RL-1	0.287265	0.288868	0.999934	1.86602		S-2-AU	Two-fold Degenerate	Summed	--A and --U	2*(1-B)
AGC	S	0.853683	I-2-GC	0.23523	0.245984	0.888041	0.342138		S-2-GC	Two-fold Degenerate	Summed	--C and --G	2B
AGG	R	-0.222728	I-RL-2	0.225175	0.22734	0.999934	0.636389		S-4-AU	Four-fold Degenerate	Summed	--A and --U	(1-B)
AGU	S	0.853683	I-2-AU	0.23523	0.245984	0.888041	0.342138		S-4-GC	Four-fold Degenerate	Summed	--C and --G	B
AUA	I	-5.70686	I-I-AU	0.231328	0.232814	0.999934	0.41671		S-I-AU	Isoleucine	Summed	AUA and AUU	2*(1-B)/(2-B)
AUC	I	0.573172	I-I-C	0.230859	0.232452	0.999934	0.53203		S-RL-2	Arginine/Leucine	Summed	(CGA, CGU, and AGG) or (CUA, CUU, and UUG)	3*B(1-B)/(1+B)
AUU	I	-1.31074	I-I-AU	0.152217	0.152901	0.999934	0.38792		S-RL-3	Arginine/Leucine	Summed	(CGG and CGC) or,(CUG and CUC)	2*B^2/(1+B)
AUU+ AUA	I	0.573172	S-I-AU
CAA	Q	0.812202	I-2-AU	0.22193	0.223241	0.999934	0.813324
CAC	H	0.871966	I-2-GC	0.163215	0.165658	0.999934	0.342923
CAG	Q	0.812202	I-2-GC	0.22193	0.223241	0.999934	0.813324
CAU	H	0.871966	I-2-AU	0.163215	0.165658	0.999934	0.342923
CCA	P	-0.440869	I-4-AU	0.210342	0.211236	0.999934	2.17461
CCC	P	0.157963	I-4-GC	0.295307	0.296525	0.999934	0.81112
CCC+CCG	P	-0.300484	S-4-GC
CCG	P	-0.918222	I-4-GC	0.314066	0.315515	0.999934	0.992943
CCU	P	-0.403999	I-4-AU	0.191955	0.19271	0.999934	0.819483
CCU+CCA	P	-0.300484	S-4-AU
CGA	R	-0.710212	I-RL-2	0.331742	0.33238	0.999934	4.21652
CGC	R	0.177433	I-RL-3	0.184676	0.186276	0.999934	0.515293
CGC+CGG	R	0.0028294	S-RL-3
CGG	R	-0.254049	I-RL-3	0.142535	0.145448	0.999934	0.441938
CGU	R	-0.164807	I-RL-2	0.065782	0.0698918	0.999934	0.529813
CGU+CGA+AGG	R	-1.43431	S-RL-2
CUA	L	-3.39676	I-RL-2	0.194505	0.196995	0.991764	0.38119
CUC	L	0.69346	I-RL-3	0.159631	0.162002	0.984431	0.281759
CUC+CUG	L	0.876967	S-RL-3
CUG	L	0.732703	I-RL-3	0.225557	0.23073	0.999934	0.327191
CUU	L	0.0502842	I-RL-2	0.167354	0.169422	0.999934	1.00713
GAA	E	0.815634	I-2-AU	0.217133	0.220333	0.999934	0.593009
GAC	D	0.845918	I-2-GC	0.15056	0.152077	0.999934	0.327968
GAG	E	0.815634	I-2-GC	0.217133	0.220333	0.999934	0.593009
GAU	D	0.845918	I-2-AU	0.15056	0.152077	0.999934	0.327968
GCA	A	0.450271	I-4-AU	0.122018	0.126556	0.999934	0.541931
GCC	A	0.671155	I-4-GC	0.198904	0.203526	0.999934	0.429814
GCC+GCG	A	0.531712	S-4-GC
GCG	A	-2.42635	I-4-GC	0.335577	0.337839	0.999934	0.73522
GCU	A	-0.341097	I-4-AU	0.237901	0.24106	0.999934	0.412488
GCU+GCA	A	0.531712	S-4-AU
GGA	G	-1.26274	I-4-AU	0.269573	0.270102	0.999934	0.98469
GGC	G	0.711512	I-4-GC	0.212783	0.21744	0.999934	0.630737
GGC+GGG	G	0.524413	S-4-GC
GGG	G	-6.80145	I-4-GC	0.193396	0.197089	0.999934	0.534252
GGU	G	-0.437575	I-4-AU	0.275002	0.275946	0.999934	0.965845
GGU+GGA	G	0.0575857	S-4-AU
GUA	V	-5.59902	I-4-AU	0.248792	0.249245	0.999934	0.75996
GUC	V	0.470669	I-4-GC	0.378273	0.37993	0.999934	0.679549
GUC+GUG	V	0.819683	S-4-GC
GUG	V	0.542188	I-4-GC	0.425769	0.428442	0.999934	0.848719
GUU	V	-0.059203	I-4-AU	0.283708	0.284769	0.999934	0.517698
GUU+GUA	V	0.819683	S-4-AU
UAC	Y	0.729813	I-2-GC	0.164705	0.166673	0.999934	0.510369
UAU	Y	0.729813	I-2-AU	0.164705	0.166673	0.999934	0.510369
UCA	S	0.717657	I-4-AU	0.193017	0.194761	0.999934	0.48422
UCC	S	0.65415	I-4-GC	0.256106	0.259886	0.978201	0.669265
UCG	S	0.419274	I-4-GC	0.346677	0.348873	0.994572	0.719608
UCU	S	-0.941407	I-4-AU	0.202658	0.20501	0.999934	0.525655
UGC	C	0.618106	I-2-GC	0.278525	0.280545	0.999934	1.04764
UGU	C	0.618106	I-2-AU	0.278525	0.280545	0.999934	1.04764
UUA	L	0.861946	I-RL-1	0.318565	0.322613	0.999934	0.543446
UUC	F	0.238359	I-2-GC	0.140475	0.143806	0.999934	0.587088
UUG	L	-2.23627	I-RL-2	0.176329	0.18	0.999934	0.52103
UUG+CUU+CUA	L	0.384395	S-RL-2
UUU	F	0.238359	I-2-AU	0.140475	0.143806	0.999934	0.587088
